# Supplementary material for: Information Transfer and Multifractal Analysis of EEG in Mild Blast-Induced TBI
Source: Hindawi journal article supplement (doi:10.1155/2021/6638724), 2021-04-06
Supplement: f2 [file 6638724.f2.pdf]

Supplementary Table 1: CART-derived parameter rules from successful models

| All lead data         |          |                                                                                                                                                                                                                                                                                                                                               |                                                                                                                                                                                                           |
|-----------------------|----------|-----------------------------------------------------------------------------------------------------------------------------------------------------------------------------------------------------------------------------------------------------------------------------------------------------------------------------------------------|-----------------------------------------------------------------------------------------------------------------------------------------------------------------------------------------------------------|
| Technique             | Subscore | CART correlation model rules                                                                                                                                                                                                                                                                                                                  | Brain regions and variables                                                                                                                                                                               |
| FT                    | RVPI     | 9 when L30.bet < 47727 & L2.alp >= 610918<br>10 when L30.bet < 47727 & L2.alp < 610918<br>10 when L30.bet >= 47727 & L58.alp >= 56373<br>11 when L30.bet >= 47727 & L58.alp < 56373                                                                                                                                                           | lower right frontal alpha<br>lower right frontal beta<br>left temporal beta                                                                                                                               |
| MF-DFA                | TPM      | 3 when L52.avgh >= 0.2 & L1.minh < 0.135<br>7 when L52.avgh >= 0.2 & L1.minh >= 0.135<br>8 when L52.avgh < 0.2 & L1.minh < 0.018 & L9.minh >= 0.1 &<br>9 when L52.avgh < 0.2 & L1.minh >= 0.018 & L9.minh >= 0.1 &<br>L24.minh >= 0.13<br>10 when L52.avgh < 0.2 & L9.minh >= 0.1 & L24.minh < 0.13<br>12 when L52.avgh < 0.2 & L9.minh < 0.1 | lower right frontal minimum h value<br>middle left frontal minimum h value<br>left temporal minimum h value<br>right temporal average h value                                                             |
| Reduced lead set data |          |                                                                                                                                                                                                                                                                                                                                               |                                                                                                                                                                                                           |
| Technique             | Subscore | CART correlation model rules                                                                                                                                                                                                                                                                                                                  | Brain regions and variables                                                                                                                                                                               |
| FT                    | RVPI     | 9.7 when L3.bet >= 124797<br>10.0 when L3.bet < 124797 & L26.bet < 34656<br>11.0 when L3.bet < 124797 & L26.bet >= 34656                                                                                                                                                                                                                      | middle right frontal beta<br>left parietal/temporal beta                                                                                                                                                  |
| ITM                   | ACH      | 7.0 when L6L56.2 < 0.86 & L40.8 < -0.66 & L36.8 >= -0.67<br>8.0 when L6L56.2 < 0.86 & L40.8 < -0.66 & L36.8 < -0.67<br>9.3 when L6L56.2 < 0.86 & L40.8 >= -0.66<br>10.0 when L6L56.2 >= 0.86 & L31.1 < -0.27 & L3.1 < -0.46<br>11.0 when L6L56.2 >= 0.86 & L31.1 < -0.27 & L3.1 >= -0.46<br>14.0 when L6L56.2 >= 0.86 & L31.1 >= -0.27        | middle frontal to left frontal 8 ms kappa ITCR<br>middle right frontal at 4 ms kappa<br>left parietal at 4 ms kappa<br>right parietal at 32 ms kappa<br>midline parietal at 32 ms kappa                   |
|                       | MAR      | 1.0 when L6.1 < -0.54<br>7.0 when L6.1 >= -0.54 & L26L36.768 < 1.2 & L3.1 < -0.58<br>9.9 when L6.1 >= -0.54 & L26L36.768 < 1.2 & L3.1 >= -0.58<br>12.7 when L6.1 >= -0.54 & L26L36.768 >= 1.2                                                                                                                                                 | midline frontal at 4 ms kappa<br>left temporal to midline parietal at<br>3 s kappa ITCR<br>middle right frontal at 4 ms kappa                                                                             |
|                       | FMT      | 4 when L19L31.768 >= 1 & L36.1 < -0.5<br>8 when L19L31.768 >= 1 & L36.1 >= -0.5 & L3.1 >= -0.6<br>9 when L19L31.768 >= 1 & L36.1 >= -0.5 & L3.1 < -0.6<br>10 when L19L31.768 < 1 & L56.64 < -1.6<br>13 when L19L31.768 < 1 & L56.64 >= -1.6                                                                                                   | left frontal to left parietal at 3 s kappa ITCR<br>midline parietal at 4 ms kappa<br>middle right frontal at 4 ms kappa<br>lateral right frontal at 256 ms kappa                                          |
|                       | RVPI     | 9 when L40.8 < -0.71 & L3.1 < -0.62<br>10 when L40.8 < -0.71 & L3.1 >= -0.62<br>10 when L40.8 >= -0.71 & L9.1 >= -0.17<br>11 when L40.8 >= -0.71 & L9.1 < -0.17                                                                                                                                                                               | middle right frontal at 4 ms kappa<br>right parietal at 32 ms kappa<br>middle left frontal at 4 ms kappa                                                                                                  |
|                       | TPM      | 5 when L9L56.16 >= 1.6<br>8 when L9L56.16 < 1.6 & L3L6.2 < 1 & L9.512 >= 3.8 &<br>L36.1 < -0.39<br>9 when L9V56.16 < 1.6 & L3L6.2 < 1 & L9.512 >= 3.8 &<br>L36.1 >= -0.39<br>10 when L9L56.16 < 1.6 & L3L6.2 < 1 & L9.512 < 3.8<br>12 when L9L56.16 < 1.6 & L3L6.2 >= 1                                                                       | middle left frontal to lateral left frontal at<br>64 ms kappa ITCR<br>middle right frontal to midline frontal at<br>8 ms kappa ITCR<br>middle left frontal at 2 s kappa<br>midline parietal at 4 ms kappa |
